# Supplementary material for: A Cavity-Tailored Metal-Organic Tetrahedral Nanocage and Gas Adsorption Property
Source: MDPI journal article supplement (doi:10.3390/nano12244402), 2022-12-09
Supplement: s1 [file s1]

# A Cavity-Tailored Metal-Organic Tetrahedral Nanocage and Gas Adsorption Property

Xin Jin <sup>1,†</sup>, Hui Jiang <sup>1,†</sup>, Yi Chen <sup>1</sup>, Xin Han <sup>1</sup>, Ken Sun <sup>1,2,\*</sup>, Linlin Shi <sup>1,\*</sup>, Xin-Qi Hao <sup>1,\*</sup> and Mao-Ping Song <sup>1,‡</sup>

<sup>1</sup> College of Chemistry, Zhengzhou University, Zhengzhou 450001, China

<sup>2</sup> College of Energy and Power Engineering, North China University of Water Resources and Electric Power, Zhengzhou 450045, China

\* Correspondence: sunken0371@126.com (K.S.); linlinshi@zzu.edu.cn (L.S.); xqhao@zzu.edu.cn (X.-Q.H.);

† These authors equally contributed to this work.

## 1. The characterization of L, Cage 1

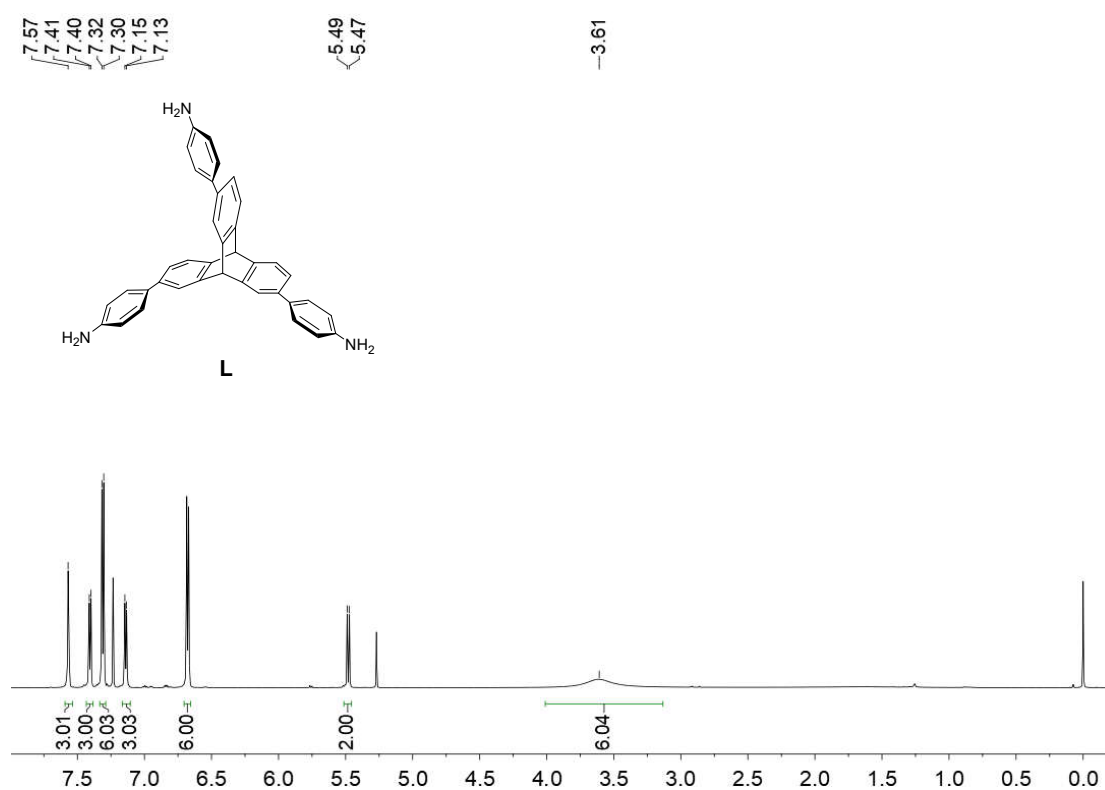

Figure S1. <sup>1</sup>H NMR (600 MHz, CDCl<sub>3</sub>) spectrum of L.

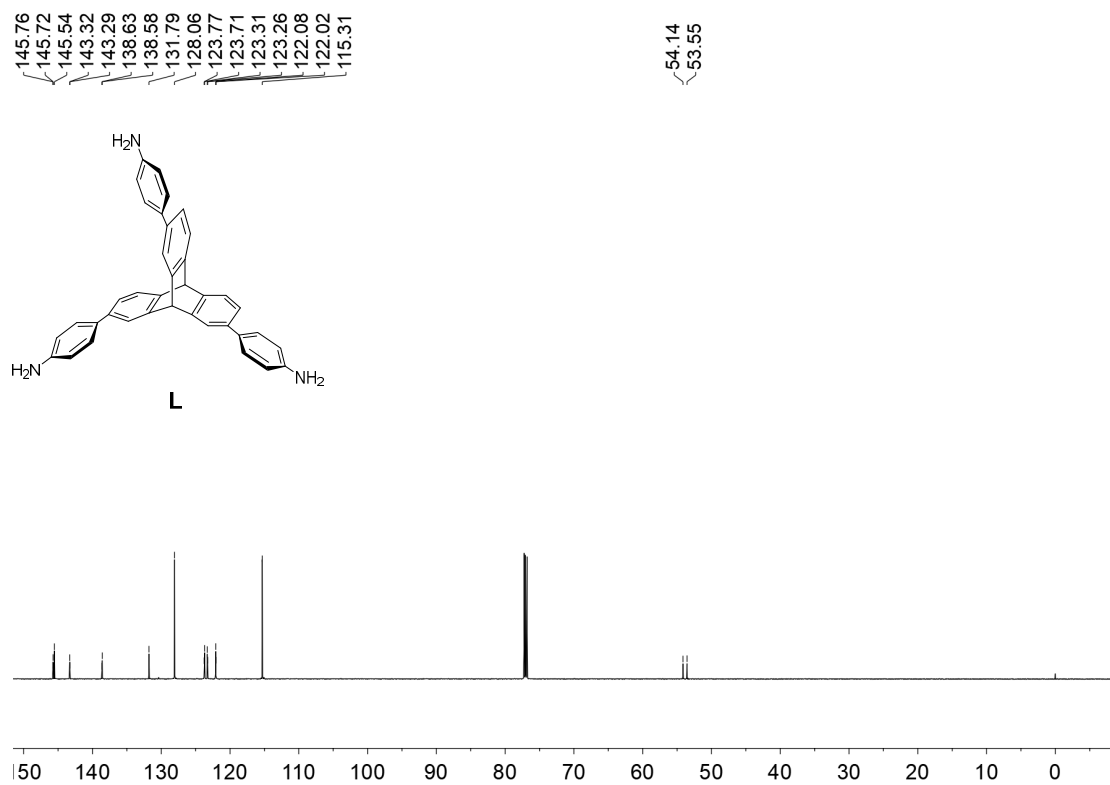

Figure S2.  $^{13}\text{C}$  NMR (151 MHz,  $\text{CDCl}_3$ ) spectrum of **L**.

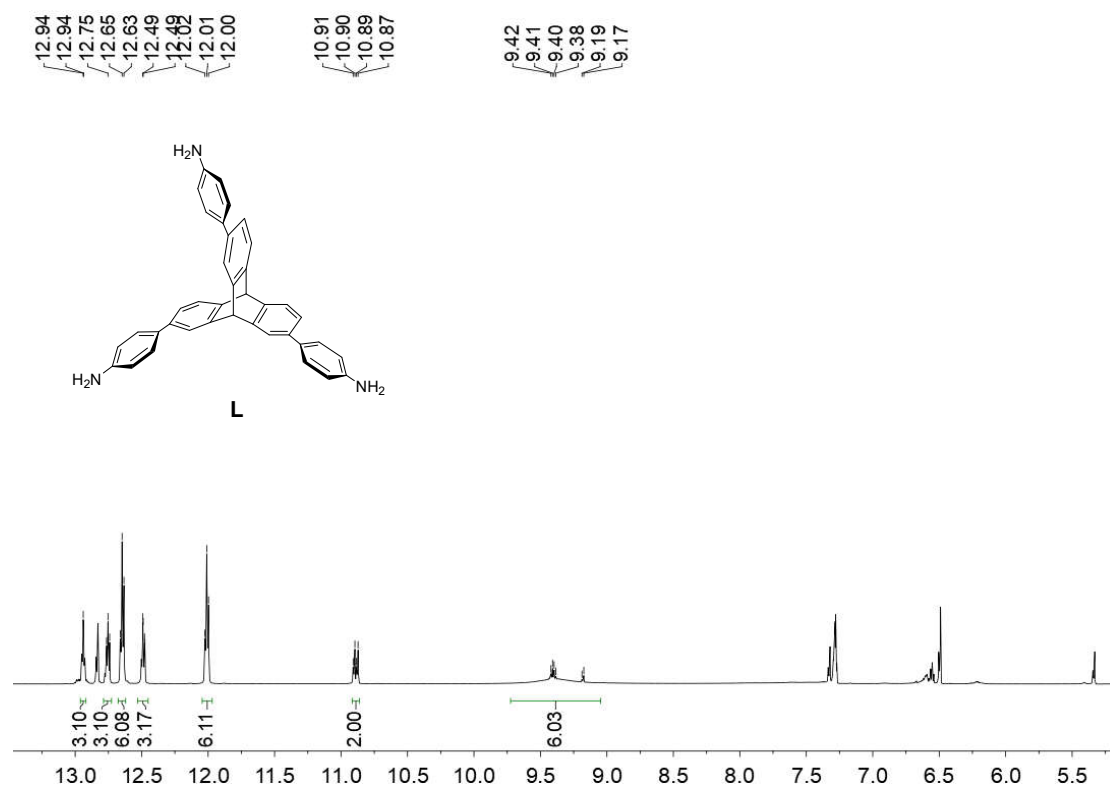

Figure S3.  $^{13}\text{C}$  NMR (151 MHz,  $\text{CDCl}_3/\text{CD}_3\text{CN}$  1:1) spectrum of **L**.

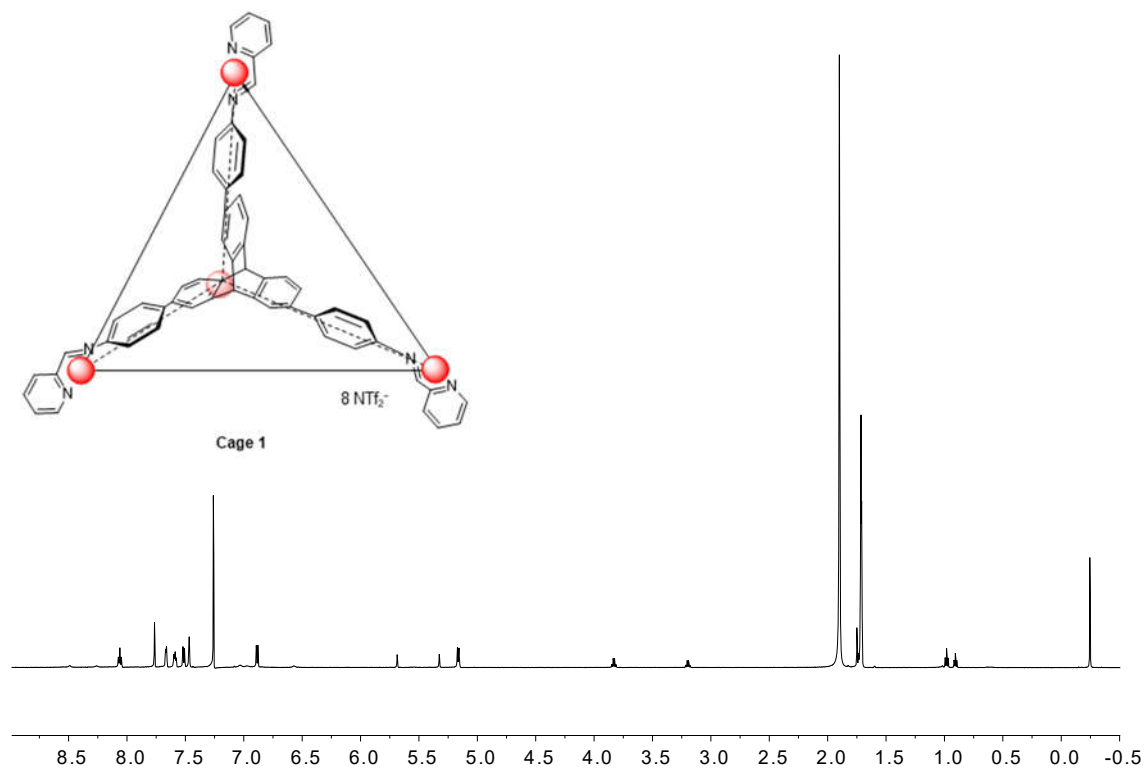

**Figure S4.** <sup>1</sup>H NMR (151 MHz, CDCl<sub>3</sub>/CD<sub>3</sub>CN 1:1) spectrum of **Cage 1**.

## 2. ESI-MS spectrum of **Cage 1**

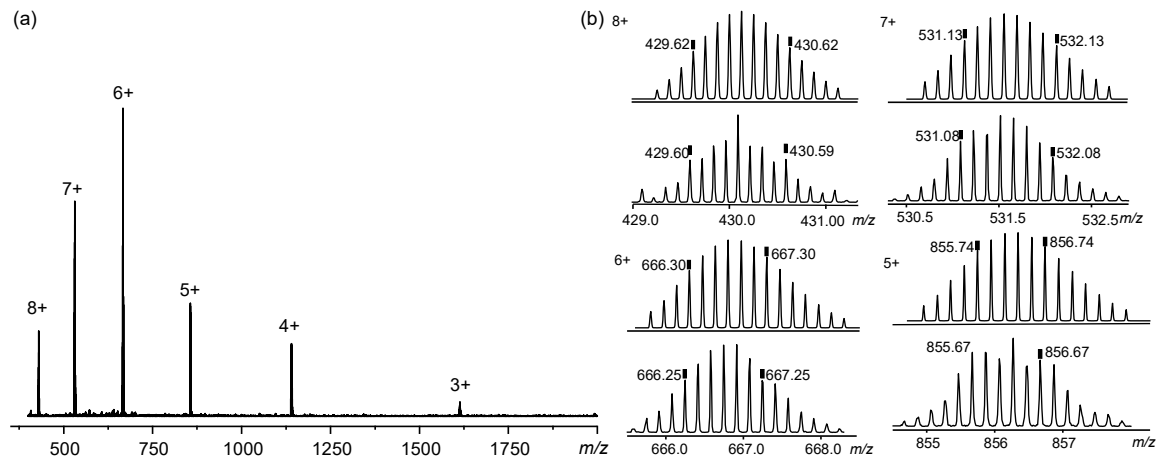

**Figure S5.** (a) and (b) ESI-MS spectrum of **Cage 1**. Theoretical (top) and experimental (bottom) isotopic patterns for different charge states observed from **Cage 1** (NTf<sub>2</sub><sup>-</sup> as the counterion).

### 3. Generation of the molecular model of Cage 1

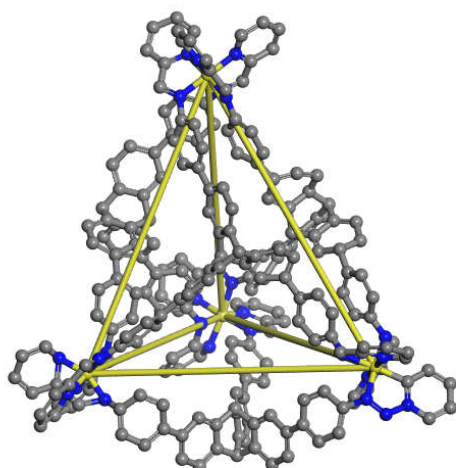

**Figure S6.** Energy-minimized molecular model of **Cage 1**. (Zn, yellow; N, blue; C, gray). Hydrogens and counter anions are omitted for clarity.

### 5. Gas adsorption properties of Cage 1

Orange powder **Cage 1** was obtained through direct precipitation of **Cage 1** from its acetonitrile solution after self-assembly by adding diethyl ether. The solid was dried under vacuum overnight. Prior to each measurement below, the sample was treated following the description in Materials and instrumentation [1].

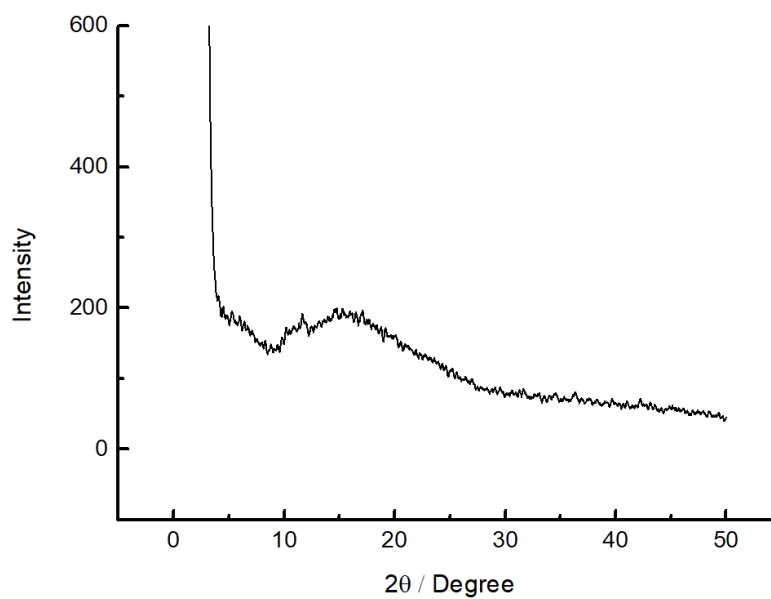

**Figure S7.** Experimental PXRD pattern of **Cage 1**.

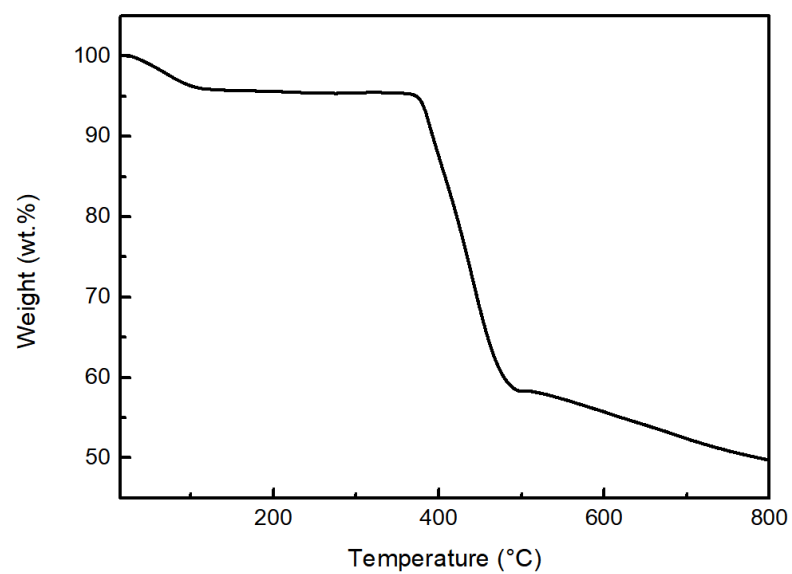

Figure S8. TGA plot of solid **Cage 1** under N<sub>2</sub>.

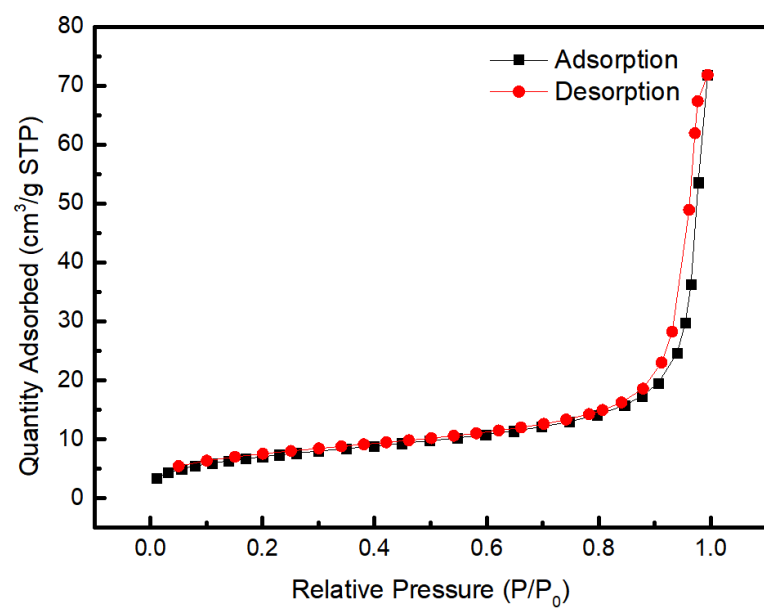

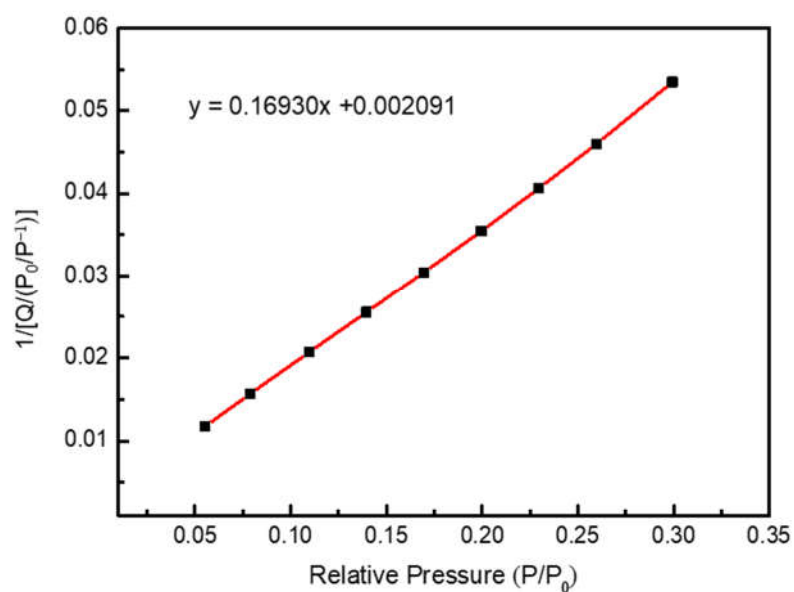

**Figure S9.** N<sub>2</sub> sorption isotherms of activated **Cage 1** measured at 77 K (upper) and plot of the linear region of the BET equation for **Cage 1** (bottom).  $S_{BET} = \frac{VmNA\sigma}{22400W} = \frac{6.022 \times 10^{23} \times [1/(0.169310 + 0.002910)] \times 1.62 \times 10^{-17}}{22400} = 25.3955 \text{ m}^2/\text{g}$

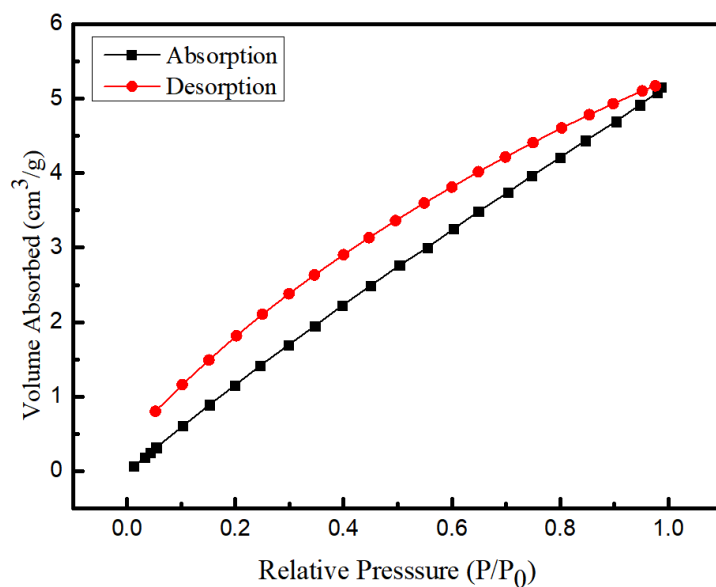

**Figure S10.** CO<sub>2</sub> adsorption/desorption isotherms of activated **Cage 1** at 298 K.

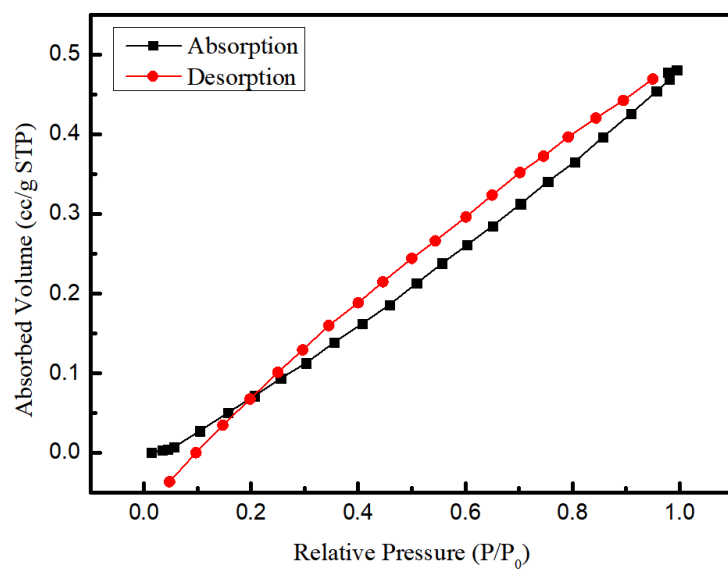

**Figure S11.**  $O_2$  adsorption/desorption isotherms of activated **Cage 1** at 298 K.

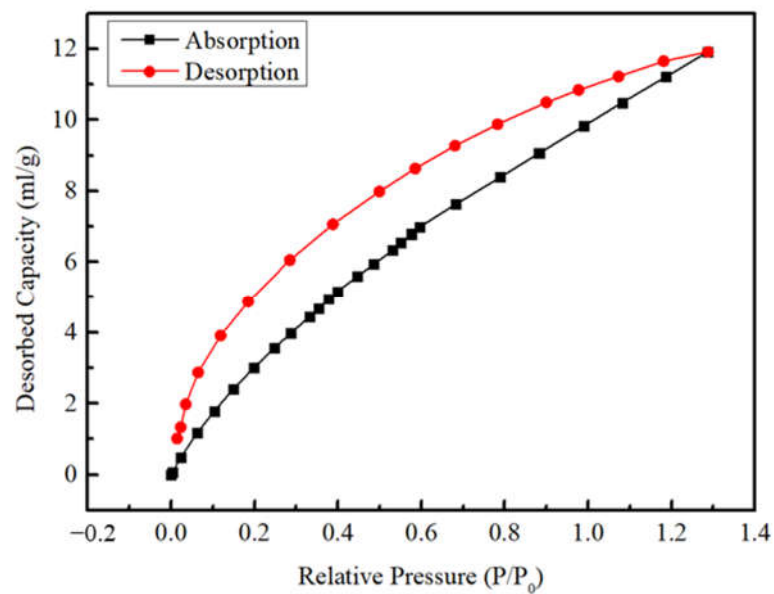

**Figure S12.**  $C_2H_2$  adsorption/desorption isotherms of activated **Cage 1** at 298 K.

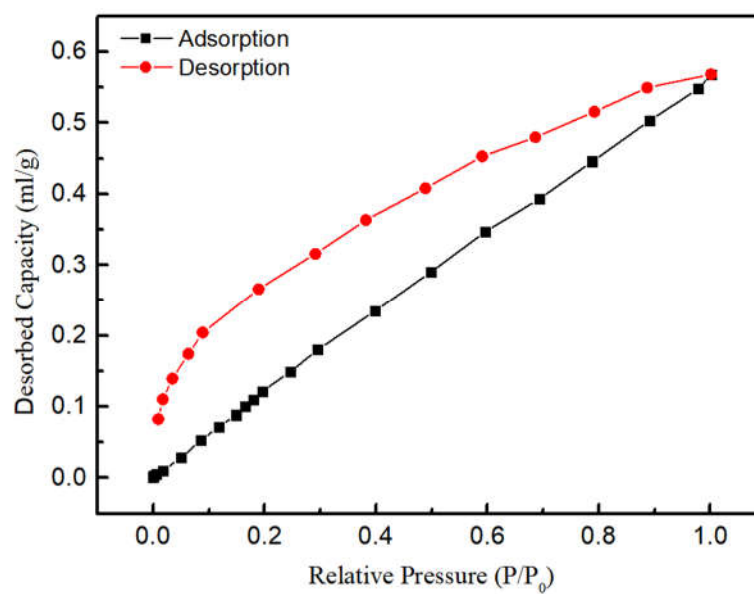

Figure S13. N<sub>2</sub> adsorption/desorption isotherms of activated **Cage 1** at 298 K.

## References

1. Zhu, J.L.; Zhang, D.; Ronson, T.K.; Wang, W.; Xu, L.; Yang, H.B.; Nitschke, J.R. A Cavity-Tailored Metal-Organic Cage Entraps Gases Selectively in Solution and the Amorphous Solid State. *Angew. Chem. Int. Ed.* **2021**, *60*, 11789–11792. <https://doi.org/10.1002/anie.202102095>.
